# Supplementary material for: Identification and Characterization of a Novel Thermostable GDSL Lipase LipGt6 from Geobacillus thermoleovorans H9
Source: MDPI journal article supplement (doi:10.3390/app14083279), 2024-04-13
Supplement: s1 [file s1]

**Table S1.** Primers used in this study.

| <b>Mutation Site</b> | <b>Primer Sequences (5' to 3')</b>                                           |
|----------------------|------------------------------------------------------------------------------|
| S47A                 | F: GCTTTAGGCGATGCCTTGACGGAAGGAGTGGGGGA<br>R: TCCTTCCGTCAAGGCATCGCCTAAAGCGACC |
| D221A                | F: TTCATCGCGCCGAATTCATCCGAATGCCGCAG<br>R: ATGAAATTCGGCGCGATGAAGCAATTCGTCGCGG |
| H224A                | F: CGAATTTGCCCCGAATGCCGCAGGATACGAAC<br>R: CATTCGGGGCAAATTCGTCGCGATGAAGCAAT   |
